# Supplementary material
Source: bioRxiv or medRxiv preprint supplement (https://www.biorxiv.org/highwire/filestream/59661/field_highwire_adjunct_files/1/195917-2.pdf)
Supplement: Supplementary file [file 195917-2.pdf]

**Table S1.** References to example datasets included in the R package bipartite, and used in Fig. 2.

| Study | Dataset name in bipartite | Reference                                                                                                                                                                                                                                                                                              |
|-------|---------------------------|--------------------------------------------------------------------------------------------------------------------------------------------------------------------------------------------------------------------------------------------------------------------------------------------------------|
| A     | barrett1987               | Barrett, S.C.H. & Helenurm, K. (1987) The reproduction biology of boreal forest herbs. 1. Breeding systems and pollination. <i>Canadian Journal of Botany</i> , <b>65</b> , 2036-2046.                                                                                                                 |
| B     | bezerra2009               | Bezerra, E.L.S., Machado, I.C.S. & Mello, M.A.R. (2009) Pollination networks of oil-flowers: a tiny world within the smallest of all worlds. <i>Journal of Animal Ecology</i> , <b>78</b> , 1096-1101.                                                                                                 |
| C     | elberling1999             | Elberling, H. & Olesen, J.M. (1999) The structure of a high latitude plant-flower visitor system: the dominance of flies. <i>Ecography</i> , <b>22</b> , 314-323.                                                                                                                                      |
| D     | inouye1988                | Inouye, D.W. & Pyke, G.H. (1988) Pollination biology in the Snowy Mountains of Australia: comparisons with montane Colorado, USA. <i>Australian Journal of Ecology</i> , <b>13</b> , 191-210.                                                                                                          |
| E     | junker2013                | Junker, R.R., Blüthgen, N., Brehm, T., Binkenstein, J., Paulus, J., Schaefer, H.M. & Stang, M. (2013) Specialization on traits as basis for the niche-breadth of flower visitors and as structuring mechanism of ecological networks. <i>Functional Ecology</i> , <b>27</b> , 329-341.                 |
| F     | kato1990                  | Kato, M., Makutani, T., Inoue, T. & Itino, T. (1990) Insect-flower relationship in the primary beech forest of Ashu, Kyoto: an overview of the flowering phenology and seasonal pattern of insect visits. <i>Contributions from the Biological Laboratory, Kyoto University</i> , <b>27</b> , 309-375. |
| G     | kevan1970                 | Kevan, P.G. (1970) High Arctic insect-flower visitor relations: the inter-relationships of arthropods and flower at Lake Hazen, Ellesmere Island, Northwest Territories. University of Alberta, Canada.                                                                                                |
| H     | memmott1999               | Memmott, J. (1999) The structure of a plant-pollinator food web. <i>Ecology Letters</i> , <b>2</b> , 276-280.                                                                                                                                                                                          |
| I     | mosquin1967               | Mosquin, T. & Martin, J.E.H. (1967) Observations on the pollination biology of plants on Melville Island, N.W.T., Canada. <i>Canadian Field Naturalist</i> , <b>81</b> , 201-205.                                                                                                                      |
| J     | motten1982                | Motten, A.F. (1986) Pollination ecology of the spring wildflower community of a temperate deciduous forest. <i>Ecological Monographs</i> , <b>56</b> , 21-42.                                                                                                                                          |
| K     | olesen2002aigrettes       | Olesen, J.M., Eskildsen, L.I. & Venkatasamy, S. (2002) Invasion of pollination networks on oceanic islands: Importance of invader complexes and endemic super                                                                                                                                          |

|   |                  |                                                                                                                                                                                                   |
|---|------------------|---------------------------------------------------------------------------------------------------------------------------------------------------------------------------------------------------|
|   |                  | generalists. <i>Diversity and Distributions</i> , <b>8</b> , 181-192.                                                                                                                             |
| L | olesen2002flores | As for K                                                                                                                                                                                          |
| M | ollerton2003     | Ollerton, J., Johnson, S.D., Cranmer, L. & Kellie, S. (2003) The pollination ecology of an assemblage of grassland asclepiads in South Africa. <i>Annals of Botany</i> , <b>92</b> , 807-834.     |
| N | Safariland       | Vázquez, D.P. & Simberloff, D (2003) Changes in interactino biodiversity induced by an introduced ungulate. <i>Ecology Letters</i> , <b>6</b> , 1077-1083.                                        |
| O | schemske1978     | Schemske, D.W., Willson, M.F., Melampy, M.N., Miller, L.J., Verner, L., Schemske, K.M. & Best, L.B. (1978) Flowering ecology of some spring woodland herbs. <i>Ecology</i> , <b>59</b> , 351-366. |
| P | small1976        | Small, E. (1976) Insect pollinators of the Mer Bleue peat bog of Ottawa. <i>Canadian Field Naturalist</i> , <b>90</b> , 22-28.                                                                    |
